# Supplementary material for: Microbiomes of different ages in Rendzic Leptosols in the Crimean Peninsula
Source: PeerJ. 2021 Feb 18;9:e10871. doi: 10.7717/peerj.10871 (PMC7897411; doi:10.7717/peerj.10871)
Supplement: Supplemental Information 2 [file peerj-09-10871-s002.xlsx]

## Sheet: crimea
	Bacteria (16S rRNA)						Archaea (16S rRNA)
Sample	1	2	3	4	5		1	2	3	4	5
K1-О_1	49860000000	2640000000	53208000000	3550800000	1.44851e+10		338400000	28560000	1075320000	111612000	7.34134e+08			Sample name:
K1-О_2	71400000000	4068000000					1308000000	171600000						Site name + horizon + soil replicate
K1-О_3	31860000000	882000000					502200000	23100000
K1-О_4	53280000000	5172000000					1044000000	84000000					1	Number of ribosomal operons per 1g soil
K1-О_5	59640000000	4992000000					2184000000	250800000					2	St. err. (comes from 3 replicate master mixes for each sample)
K1-AY_1	58920000000	2436000000	69588000000	5422800000	1.55327e+10		1860000000	81000000	2374800000	138720000	9.54004e+08		3	Mean number of of ribosomal operons per 1g soil
K1-AY_2	63600000000	7920000000					996000000	76800000					4	Mean of st err for individual replicates (column 2)
K1-AY_3	55620000000	6540000000					2694000000	71400000					5	St. err. of means for 5 soil replicates
K1-AY_4	93600000000	4506000000					3420000000	236400000																														0.629464
K1-AY_5	76200000000	5712000000					2904000000	228000000
K1-С_1	76200000000	3318000000	58860000000	3955200000	1.92886e+10		3894000000	209400000	3080400000	161976000	1.27292e+09
K1-С_2	65400000000	5322000000					3576000000	22080000
K1-С_3	55320000000	2634000000					3132000000	237600000
K1-С_4	70200000000	6240000000					3924000000	223800000
K1-С_5	27180000000	2262000000					876000000	117000000
K2-AY_1	50580000000	3342000000	45180000000	3650400000	1.39223e+10		1320000000	38280000	1270560000	43080000	8.78362e+08
K2-AY_2	41520000000	1434000000					1236000000	13980000
K2-AY_3	48000000000	1794000000					888000000	69600000
K2-AY_4	61800000000	4122000000					2652000000	78600000
K2-AY_5	24000000000	7560000000					256800000	14940000
K2-С_1	51780000000	2040000000	43572000000	3739200000	1.52757e+10		2076000000	83400000	1494480000	90624000	1.0868e+09
K2-С_2	22080000000	1512000000					441000000	26700000
K2-С_3	35640000000	1080000000					239400000	108600000
K2-С_4	46560000000	5904000000					2034000000	24420000
K2-С_5	61800000000	8160000000					2682000000	210000000
K3-AY_1	63000000000	4518000000	52560000000	3180000000	1.97925e+10		1896000000	114000000	1338840000	88992000	6.56544e+08
K3-AY_2	61800000000	696000000					1278000000	94200000
K3-AY_3	49500000000	1650000000					1128000000	92400000
K3-AY_4	69000000000	7200000000					2010000000	112200000
K3-AY_5	19500000000	1836000000					382200000	32160000
K3-С_1	44340000000	3738000000	30240000000	2169600000	9.07717e+09		1680000000	124200000	864240000	62028000	4.68262e+08
K3-С_2	23400000000	1590000000					822000000	57960000
K3-С_3	21960000000	714000000					648000000	32400000
K3-С_4	28020000000	2622000000					523200000	27180000
K3-С_5	33480000000	2184000000					648000000	68400000
K6-AY_1	63600000000	3666000000	58188000000	3734280000	6.94348e+09		2148000000	187800000	2178000000	119640000	3.54381e+08
K6-AY_2	52320000000	4512000000					1926000000	118200000
K6-AY_3	59040000000	533400000					2586000000	123000000
K6-AY_4	49980000000	1920000000					1752000000	120600000
K6-AY_5	66000000000	8040000000					2478000000	48600000
